# Supplementary material for: Fecal virome characterization of dairy cows with winter dysentery reveals bovine torovirus, enterovirus F, a novel and recombinant enterovirus I, and a putative novel protoparvovirus
Source: Research Square preprint supplement (doi:10.21203/rs.3.rs-7116208/v1), 2025-07-25
Supplement: Supplementary file 1 [file d0bb063c00c4e452c2794949.docx]

**Supplementary material**

>Protoparvovirus Uruguay NS1 complete sequence low reliability

ATGGCACAAGCTATGATTGCAGACGAAGTGACGGAGGCAGTTTCTTGGTTGGTGGCCAATGAAGATCAACAGGGAATTAGTTATGTCTTCAGAATCAAGGACATAACACTAGGAGACGCCACAACAAAAATAACATGGAAAAACTACACCAAAACTCCAGGTCAAAAATGTCTATTTGAATTATTTAAAAATAAGAACATAGCACCAGGAGACATCAAATGGTTTTTACAACCAGAATTTAGCACAGATCAACAATTTCATGTGCATTGCTTACTATGGGGAGAATCAGTAAAACAAATACATGGTAAATGGTGGCAAAAATATCTATCTGCAGCATGGAGCCGATGGCTCACAGCAGCATTAGGCACATTACTTTCACCAGGCACAAGAATGGACATCAGAAACAAAATAGAATCAGACAATTGGATAGACATATTACAATACAAAAATAAAACCACTGCTAAACACTATGTAAAAATGGTAAACATATCTCAAATAATAGCAAATTACTTCTTATTAAAAGATGCATGGTGGCTAAAAAAACCAAGCATCTATTATTGCTCATCAGACAGTGGTCTAAAAATAGACAACCTATCATTTTCACAAAGACTAGCCACAAGCAAACTATTTTTACGCATGCAAGACAAACCAGACACATCTAAAAGACAGATAGAAACCACATCAGCACAAGAACACAAAAAACAAAGAATAGAGACACAAAAAGAAAAAACAGTTAAAGAAACTGTATGCCTATTATTTGACAATAGAGTAATAACTTCTGAAGAATGGGCACTATTTGATCCAGATAGCTATGTTCACATAATGACTCAACCAAACGGAGAAGCTCTCATTCGAAGTATATTAGACATAGTCACATTAAAAATGGCAAAAACAATGACAGCTTTTGAACTAGTAAGAGAAAGACACACTGAAGCCTTAGACAATATAGAAGACACCAAAATATTTCAAATATTCAACCTCAACAAAATGAATCCATTTAAAGTAATACACGCAATCATGTGCTGTCTAAACAAACAAAGTGGCAAACGCAACACAATTTTATTCAACGGGCCAGCTACAACAGGAAAAAGCATATTAGCACAAAGCCTCTGTTACTTAGTTAGCAATGTAGGCTGCTATAATCCAGCCAATGTAAACTTTCCATTTAATGACTGTACAAATAAAAATATCATCTGGGTAGAAGAAGCAGCTAGCTTTGGACAACAAGTAAACCAATTTAAAGCTATTTGCAGCGGTCAGACTATCCGCATAGATCAAAAAGGAAAAGGCAGTAAAACTATAGAACCAACACCAGTAGTCATGACTACTAATGAAGACATAACAGAAGTCCGCATAGGCTGTGAAATCAGACCAGAACACACTCAGCCAATCAAAGACAGNATGTTAAACATAAAATTAACACATAGACTACCAGGAGACTTTGGACTGATACCTACAACTGAATGGGCTAACATATTTGACTGGATGGTTGCTTGCTTTTATGAACCAACTATGGCTAACTATATTAAACGCTGGGGACGCACCCCTGTCTGGGAAGAAGATTGGACTAGTCCAAGCCTTATAAAACCAGGACCAGGCTCATCACTTCTCATTCAAGCAGATGTCCATGCTCCACGAGGAGAAGAAACATACACTCCTCCAGATCTAGCAGACCTGCTAGATGCTTGGGAAACTTCTGAGAAAGTAAATTCTCAGAAACTCAACGACAGTCTGCTAGAAGAAGACACCACATCCTCTCACGAGCCTGAGAACAACTAA

**Table S1. Evolutionary divergence between CPBI/UYU/2024 and related protoparvovirus.** Complete NS1 sequences were used for the analysis.

|  | Amino acid | Nucleotide |
| --- | --- | --- |
| NC_075988.1_Tusavirus_1_strain_Tu491 | 0.347 | 0.342 |
| OL692339.2_Protoparvovirus_sp._strain_goat_tusavirus/KT-G5/2020/HUN | 0.352 | 0.348 |
| OR734234.1_Ovine_tusavirus_strain_OTV/0215 | 0.345 | 0.352 |
| OQ708493.1_Tusavirus_1_strain_GZ814 | 0.348 | 0.350 |
| PP083003.1_Protoparvovirus_incertum1_strain_NM21C6 | 0.343 | 0.355 |
| OQ708494.1_Tusavirus_1_strain_GZ1068 | 0.352 | 0.353 |

**
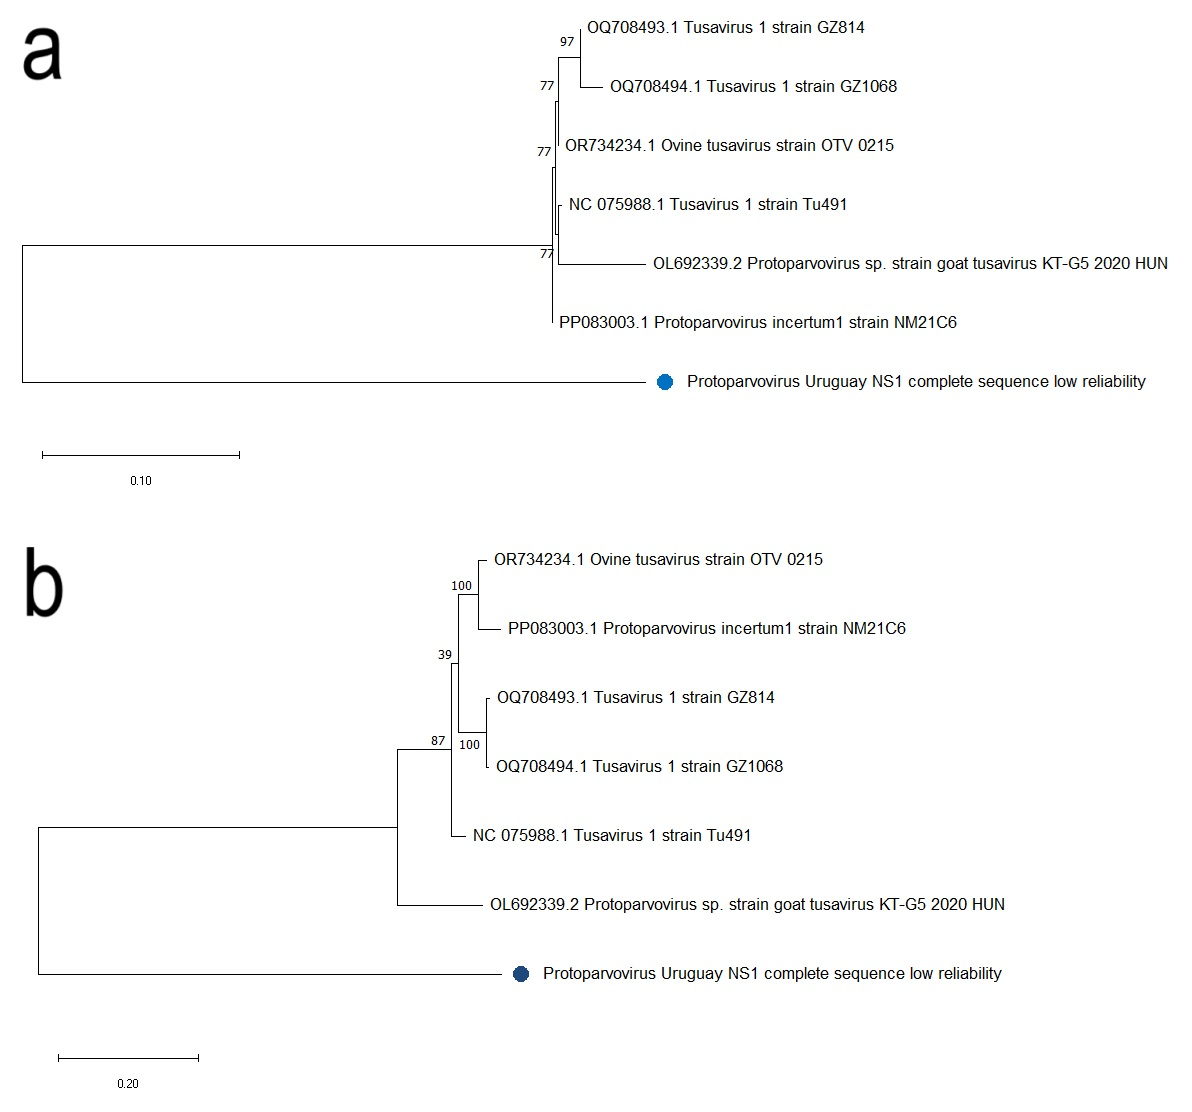
**

**Figure S1. Phylogenetic analysis of CPBI/UYU/2024 and the closest related protoparvoviruses.** Maximum likelihood trees based on amino acid (a) and nucleotide (b) NS1 complete sequences. aLRT values and scale bars are shown for both trees. The sequence obtained in this study is highlighted with a blue circle.
